# Supplementary material for: Dexmedetomidine in combination with morphine improves postoperative analgesia and sleep quality in elderly patients after open abdominal surgery: A pilot randomized control trial
Source: PubMed Central journal article supplement (PMC6091958; doi:10.1371/journal.pone.0202008), 2018-08-14
Supplement: pone.0202008.s004.pdf [file pone.0202008.s004.pdf]

# 北京大学第一医院临床伦理委员会伦理审查批件

伦理审查编号：(2014) 药物非注册第 (24) 号

|                                                                                                                                                                                                                                                                                                                                                                                                                                                                                                                                                                                  |                                                                                                                                                                                                                          |                       |     |
|----------------------------------------------------------------------------------------------------------------------------------------------------------------------------------------------------------------------------------------------------------------------------------------------------------------------------------------------------------------------------------------------------------------------------------------------------------------------------------------------------------------------------------------------------------------------------------|--------------------------------------------------------------------------------------------------------------------------------------------------------------------------------------------------------------------------|-----------------------|-----|
| 项目名称                                                                                                                                                                                                                                                                                                                                                                                                                                                                                                                                                                             | 右美托咪定于老年患者术后镇痛的有效性研究                                                                                                                                                                                                     |                       |     |
| CFDA 批件号                                                                                                                                                                                                                                                                                                                                                                                                                                                                                                                                                                         | /                                                                                                                                                                                                                        |                       |     |
| 申办者                                                                                                                                                                                                                                                                                                                                                                                                                                                                                                                                                                              | 北京大学第一医院 麻醉科                                                                                                                                                                                                             |                       |     |
| 临床研究科室                                                                                                                                                                                                                                                                                                                                                                                                                                                                                                                                                                           | 麻醉科                                                                                                                                                                                                                      | 主要研究者                 | 王东信 |
| 送审文件                                                                                                                                                                                                                                                                                                                                                                                                                                                                                                                                                                             | 具体见随附“北京大学第一医院临床伦理委员会审查文件清单”                                                                                                                                                                                             |                       |     |
| 本伦理委员会的人员组成和工作程序符合中国 GCP 以及国家相关规定                                                                                                                                                                                                                                                                                                                                                                                                                                                                                                                                                |                                                                                                                                                                                                                          |                       |     |
| 伦理审查方式： <input checked="" type="checkbox"/> 会议审查 <input checked="" type="checkbox"/> 快速审查                                                                                                                                                                                                                                                                                                                                                                                                                                                                                        |                                                                                                                                                                                                                          |                       |     |
| 会议审查时间：2014 年 09 月 10 日                                                                                                                                                                                                                                                                                                                                                                                                                                                                                                                                                          |                                                                                                                                                                                                                          | 会议地点：北京大学第一医院伦理委员会会议室 |     |
| 审查委员                                                                                                                                                                                                                                                                                                                                                                                                                                                                                                                                                                             | 见随附“伦理委员会会议签到表”。                                                                                                                                                                                                         |                       |     |
| 审查意见                                                                                                                                                                                                                                                                                                                                                                                                                                                                                                                                                                             | 1. 经本伦理委员会审查：同意进行该临床研究。<br>意见和建议：无。<br>2. 该研究进行过程中将接受伦理委员会的定期跟踪审查？ <input checked="" type="checkbox"/> 是 <input type="checkbox"/> 否<br>定期跟踪审查频率： <input type="checkbox"/> 6 个月 <input checked="" type="checkbox"/> 12 个月 |                       |     |
| 注意事项：<br>1. 本项临床试验应当在伦理委员会同意进行之日起 1 年内实施。逾期未实施的，本审查批件自行废止。<br>2. 研究应遵循本伦理委员会批准的方案执行，须符合 CFDA/GCP 和《赫尔辛基宣言》的原则。<br>3. 自同意研究之日起，每隔 12 个月伦理委员会的定期跟踪审查（审查频度可能根据实际进展情况改变）；请在定期跟踪审查到期前 1 个月递交《定期跟踪审查表》。<br>4. 研究过程中，对研究方案和知情同意书等相关文件所作的任何修改，请交《修正案申请表》及“送审文件清单”中规定相关资料，并得到伦理委员会审查同意该修正后方可实施。<br>5. 发生严重不良事件或影响研究风险受益比的非预期不良事件，在向 CFDA 上报的同时向伦理委员会作书面通报，可以使用 CFDA 的《严重不良事件报告表》或本伦理委员会公布的《严重不良事件/非预期不良事件报告表》或其他有相关内容的报告表，但外文的报告需要有中文摘要。伦理委员会有权根据对其评估做出新的决定。<br>6. 不依从或违反方案应及时提交《不依从或违反方案报告表》。<br>7. 提前终止研究应及时提交《研究方案提前终止报告表》。<br>8. 研究完成后提交《研究结题报告表》和临床试验总结报告。<br>9. 及时书面报告其他伦理委员会的重要决定。 |                                                                                                                                                                                                                          |                       |     |
| 主任委员或副主任委员签字： 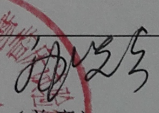                                                                                                                                                                                                                                                                                                                                                                                                                                                                              |                                                                                                                                                                                                                          |                       |     |
| 北京大学第一医院临床伦理委员会（盖章）                                                                                                                                                                                                                                                                                                                                                                                                                                                                                                                                                              |                                                                                                                                                                                                                          |                       |     |
| 2014 年 11 月 6 日                                                                                                                                                                                                                                                                                                                                                                                                                                                                                                                                                                  |                                                                                                                                                                                                                          |                       |     |

伦理委员会地址：北京市西城区大红罗厂街 6 号    邮编：100034    联系电话：010-66119025
